# Supplementary material for: Facilitating clinically relevant skin tumor diagnostics with spectroscopy-driven machine learning
Source: PubMed Central journal article supplement — iScience. 2024 Apr 1;27(5):109653. doi: 10.1016/j.isci.2024.109653 (PMC11053315; doi:10.1016/j.isci.2024.109653), 2024-04-01
Supplement: mmc1.pdf [file mmc1.pdf]

**iScience, Volume 27**

**Supplemental information**

**Facilitating clinically relevant**

**skin tumor diagnostics**

**with spectroscopy-driven machine learning**

**Emil Andersson, Jenny Hult, Carl Troein, Magne Stridh, Benjamin Sjögren, Agnes Pekar-Lukacs, Julio Hernandez-Palacios, Patrik Edén, Bertil Persson, Victor Olariu, Malin Malmjö, and Aboma Merdasa**

**Table S1: Patient data**, related to STAR Methods.

| Lesion (patient) no. | Sex    | Age  | Fitzpatrick skin<br>type (1-VI) | Diagnosis                    |
|----------------------|--------|------|---------------------------------|------------------------------|
| 1 (1)                | Male   | 60's | I                               | Malignant melanoma, in situ  |
| 2 (2)                | Male   | 50's | II                              | Dysplastic nevus             |
| 3 (3)                | Male   | 60's | II                              | Fibrohistiocytoma            |
| 4 (4)                | Male   | 60's | II                              | Basal cell carcinoma         |
| 5 (5)                | Male   | 50's | N/I                             | Papilloma                    |
| 6 (6)                | Female | 40's | II                              | Dysplastic nevus             |
| 7 (7)                | Male   | 80's | II                              | Squamous cell carcinoma      |
| 8 (8)                | Male   | 20's | IV                              | Blue nevus                   |
| 9 (9)                | Female | 40's | II                              | Nevus                        |
| 10 (10)              | Female | 70's | II                              | Basal cell carcinoma         |
| 11 (11)              | Female | 60's | II                              | Malignant melanoma, in situ  |
| 12 (12)              | Female | 70's | II                              | Basal cell carcinoma         |
| 13 (13)              | Female | 60's | II                              | Squamous cell carcinoma      |
| 14 (14)              | Male   | 60's | II                              | Nevus                        |
| 15 (15)              | Male   | 60's | II                              | Nevus and blue nevus         |
| 16 (16)              | Female | 60's | II                              | Basal cell carcinoma         |
| 17 (17)              | Male   | 40's | II                              | Malignant melanoma, invasive |
| 18 (17)              | Male   | 40's | II                              | Nevus                        |
| 19 (18)              | Male   | 80's | II                              | Malignant melanoma, invasive |

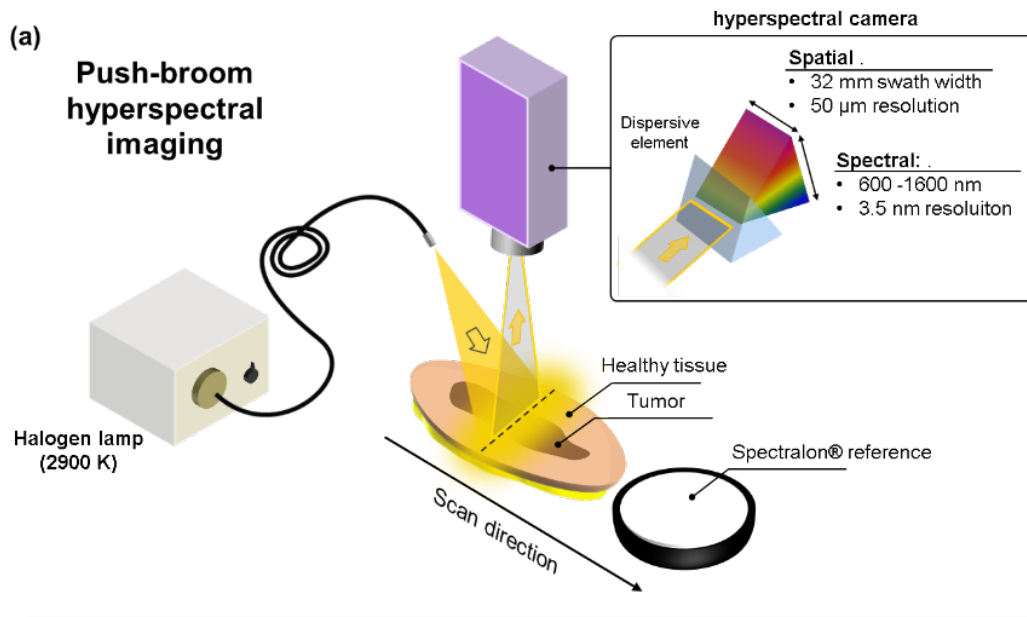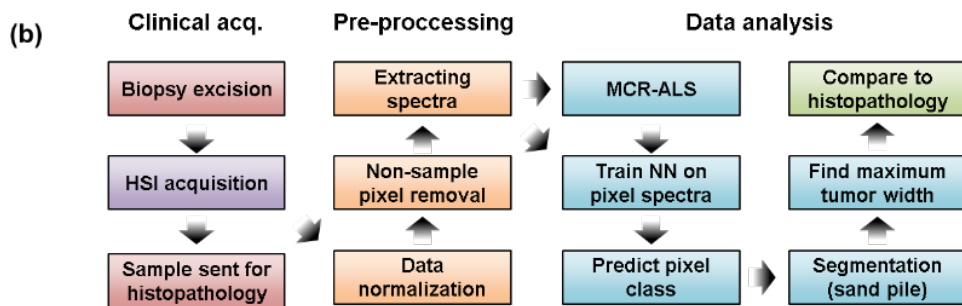

**Figure S1: Method overview**, related to STAR Methods.

(a) Schematic demonstrating the spatial scanning hyperspectral measurement geometry in which a white incandescent lamp is used to illuminate the sample surface. A line is thereafter imaged, via a slit, onto an area detector. Prior to reaching the detector, the light is dispersed by a prism at each point along the line such that one dimension of the detector area captures the spectral information, while the other dimension captures the spatial information. By scanning the entire system across a surface, a hyperspectral image is obtained. A white reference placed at the same height as the sample is also scanned in every measurement. (b) Flow chart demonstrating the procedure going from acquisition of data from patient using HSI, through pre-processing of the data and finally to the data analysis.

**Table S2: Data properties**, related to Figure 3 and STAR Methods.

The number of pixels each sample consists of, the number of pixels in the selected tumor and healthy tissue areas, and the samples' histopathological widths.

| Lesion no. | # sample pixels | # tumorous pixels | # healthy pixels | Histopathological width (mm) |
|------------|-----------------|-------------------|------------------|------------------------------|
| 1          | 93363           | 709               | 754              | 6.89                         |
| 2          | 210700          | 1961              | 2514             | 15.7                         |
| 3          | 152591          | 1009              | 754              | 6.78                         |
| 4          | 30534           | 197               | 226              | 7.83                         |
| 6          | 27404           | 197               | 226              | 2.39                         |
| 7          | 136424          | 1257              | 1226             | 13                           |
| 8          | 174442          | 1009              | 1226             | 9.45                         |
| 9          | 49739           | 1257              | 298              | 4.89                         |
| 10         | 49468           | 1961              | 2018             | 3.45                         |
| 11         | 149952          | 1257              | 1594             | 8.58                         |
| 12         | 143629          | 1653              | 1594             | 6.76                         |
| 13         | 46080           | 529               | 394              | 4.97                         |
| 14         | 62715           | 709               | 506              | 2.86                         |
| 15         | 18392           | 317               | 298              | 1.6                          |
| 16         | 55359           | 709               | 754              | 6.61                         |
| 17         | 112117          | 1653              | 1594             | 8.31                         |
| 18         | 52377           | 613               | 754              | 4.84                         |
| 19         | 145197          | 1961              | 2018             | 8.54                         |

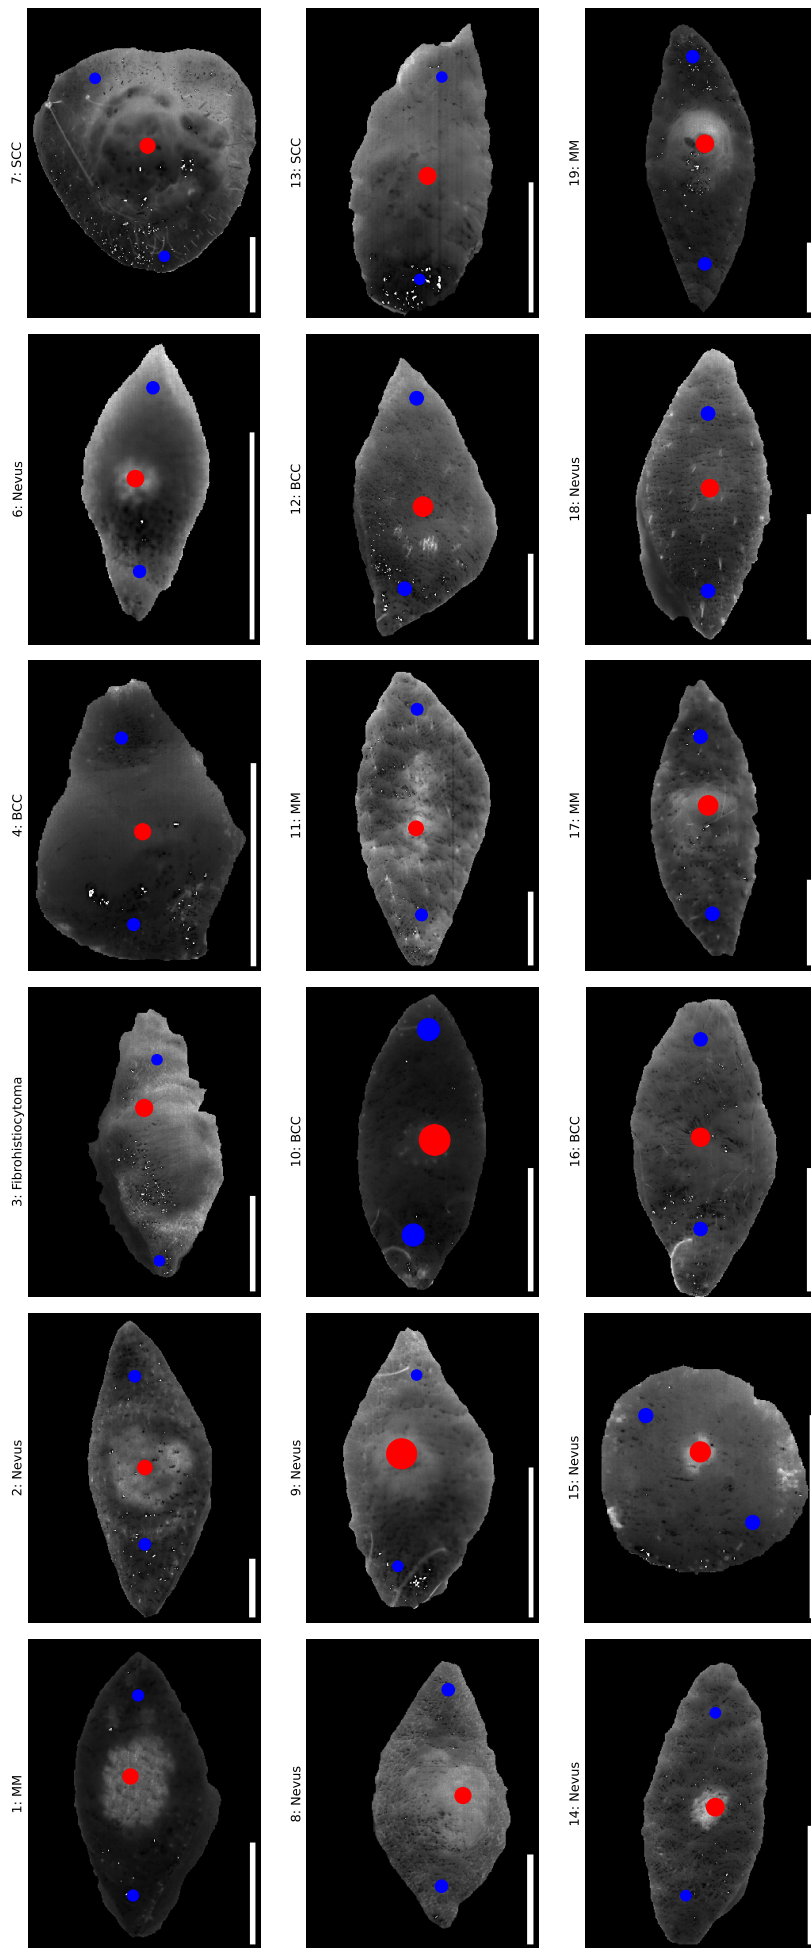

**Figure S2: Training regions**, related to Figure 3.

The training regions used for each sample with blue representing healthy tissue and red tumor. The tumor samples are shown at 640 nm.

**Table S3: Model hyperparameters**, related to STAR Methods.

(a) Grid search parameters.

| Hyperparameter | Search values             |
|----------------|---------------------------|
| Learning rate  | [0.025, 0.07, 0.01, 0.15] |
| Batch size     | [0.2, 0.5, 1.0]           |

(b) **Network architectures.** The square brackets denotes an architecture where each item is a hidden layer. All convolutional filters and maxpoolings are 1-dimensional.  $XC$  denotes number of channels and  $YS$  denotes stride  $Y$ .

| Model                | Architecture                                                                                                                                                                                                                                                                                                                                                                                                                                                                                                                                                          |
|----------------------|-----------------------------------------------------------------------------------------------------------------------------------------------------------------------------------------------------------------------------------------------------------------------------------------------------------------------------------------------------------------------------------------------------------------------------------------------------------------------------------------------------------------------------------------------------------------------|
| MLP,<br>MLP: MCR-ALS | [2], [8], [20], [100], [2,2], [8,8], [100,100], [2,2,2], [8, 8, 8]                                                                                                                                                                                                                                                                                                                                                                                                                                                                                                    |
| CNN                  | [Conv(10, 10C, 10S), MaxPool(2, 2S), Conv(5, 20C, 1S), Dense(10)],<br>[Conv(10, 10C, 10S), MaxPool(2, 2S), Conv(5, 20C, 1S),<br>MaxPool(2, 2S), Conv(5, 20C, 1S), Dense(10)],<br>[Conv(10, 10C, 5S), MaxPool(2, 2S), Conv(5, 20C, 5S),<br>MaxPool(2, 2S), Conv(3, 20C, 2S), Dense(10)],<br>[Conv(20, 10C, 10S), MaxPool(2, 2S),<br>Conv(10, 20C, 5S), Dense(10)],<br>[Conv(5, 10C, 1S), Conv(10, 10C, 1S), MaxPool(2, 2S),<br>Conv(10, 20C, 1S), Dense(10)],<br>[Conv(20, 10C, 5S) MaxPool(2, 2S), Conv(10, 10C, 2S),<br>MaxPool(2, 2S), Conv(5, 10C, 1S), Dense(10)] |

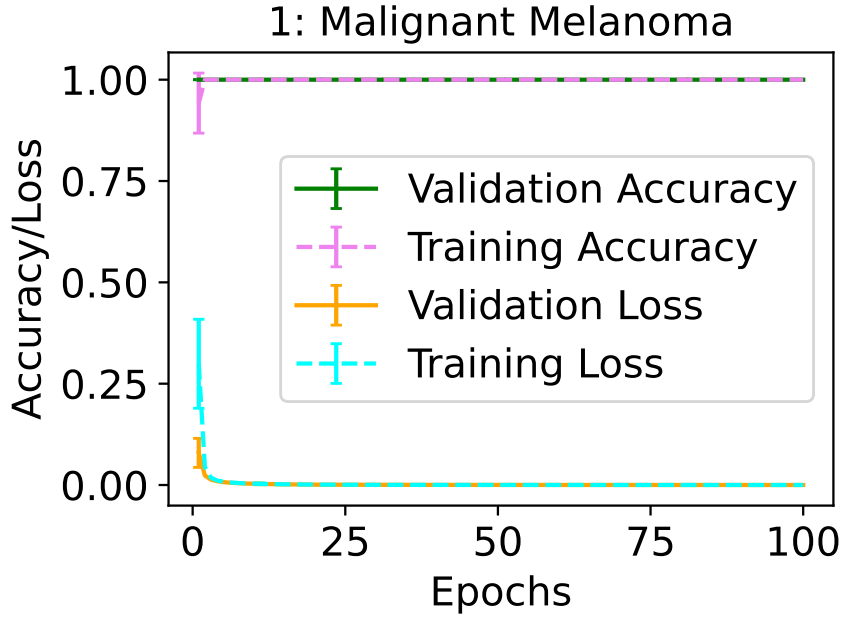

**Figure S3: Training and validation performance history**, related to STAR Methods.

Training and validation accuracy and loss history for a representative sample during training. The errorbars indicate the standard deviation.

**Table S4: Parameters for the active contour algorithm**, related to STAR Methods

| Time step         | $\beta$ | $\gamma$ | $\omega$ |
|-------------------|---------|----------|----------|
| $0 < t < 30$      | 0       | 10       | 0        |
| $30 \leq t < 500$ | 1       | 1        | 0.5      |

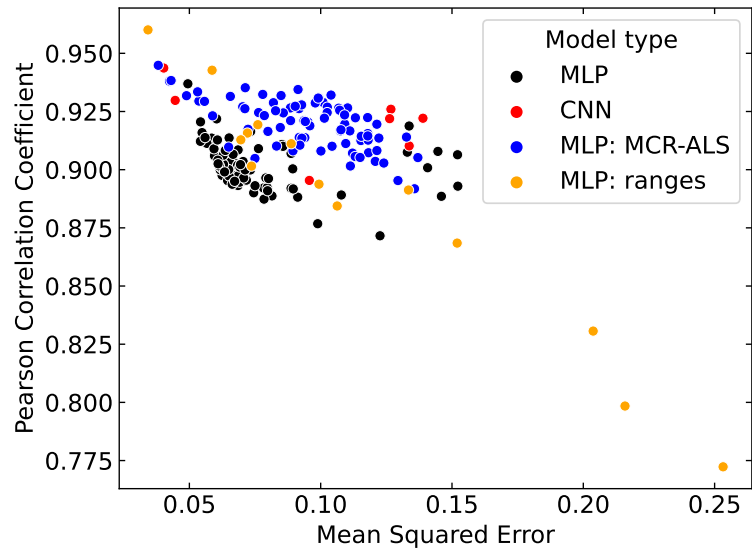

**Figure S4: Model validation**, related to STAR Methods and Figures 5 & 6.

Each dot represent a model from the grid search (Table S3) in the relative MSE - Pearson Correlation Coefficient space. The color of the dots represent the different kinds of models. The orange orange “MLP: ranges” refer to the MLP trained of various sets of ranges. The top-left corner represents the lowest error and highest correlation.

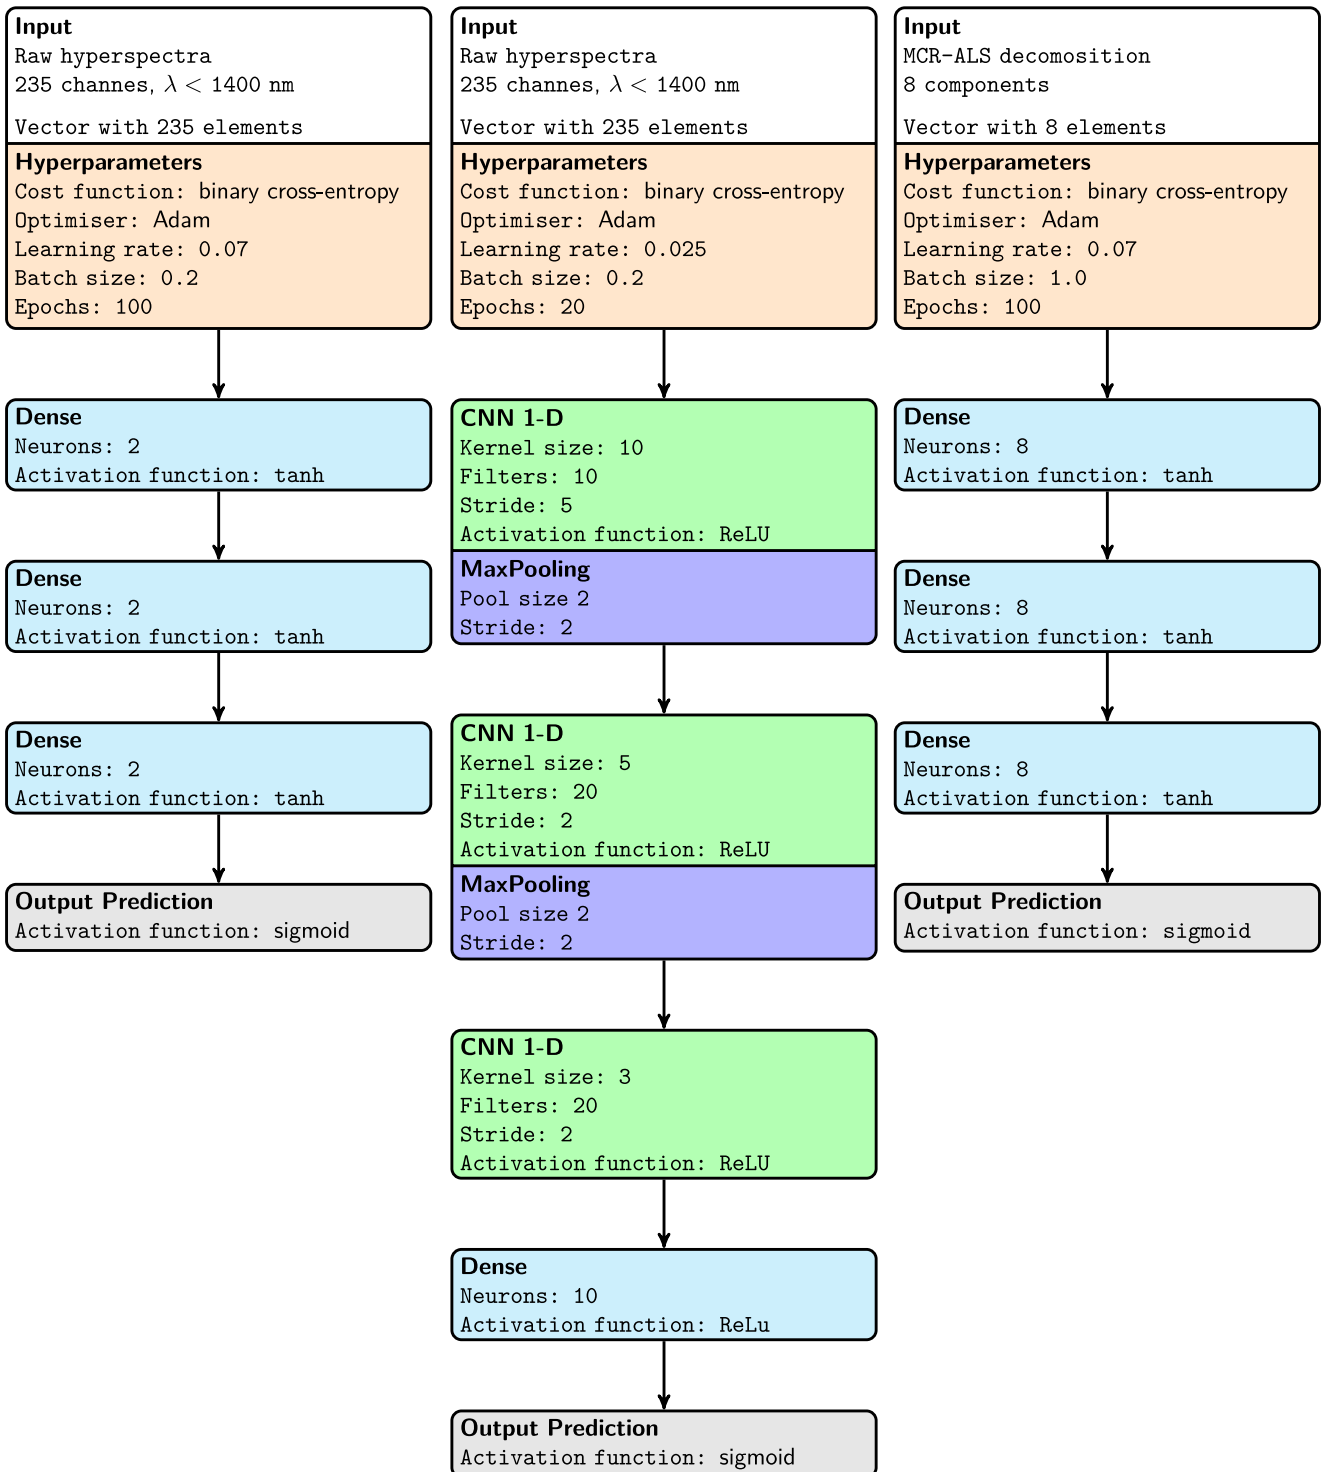

**Figure S5: Specifications of final models**, related to STAR Methods.

Model specifications for (left) the MLP, (middle) the CNN, and (right) the MLP on the MCR-ALS decomposition.



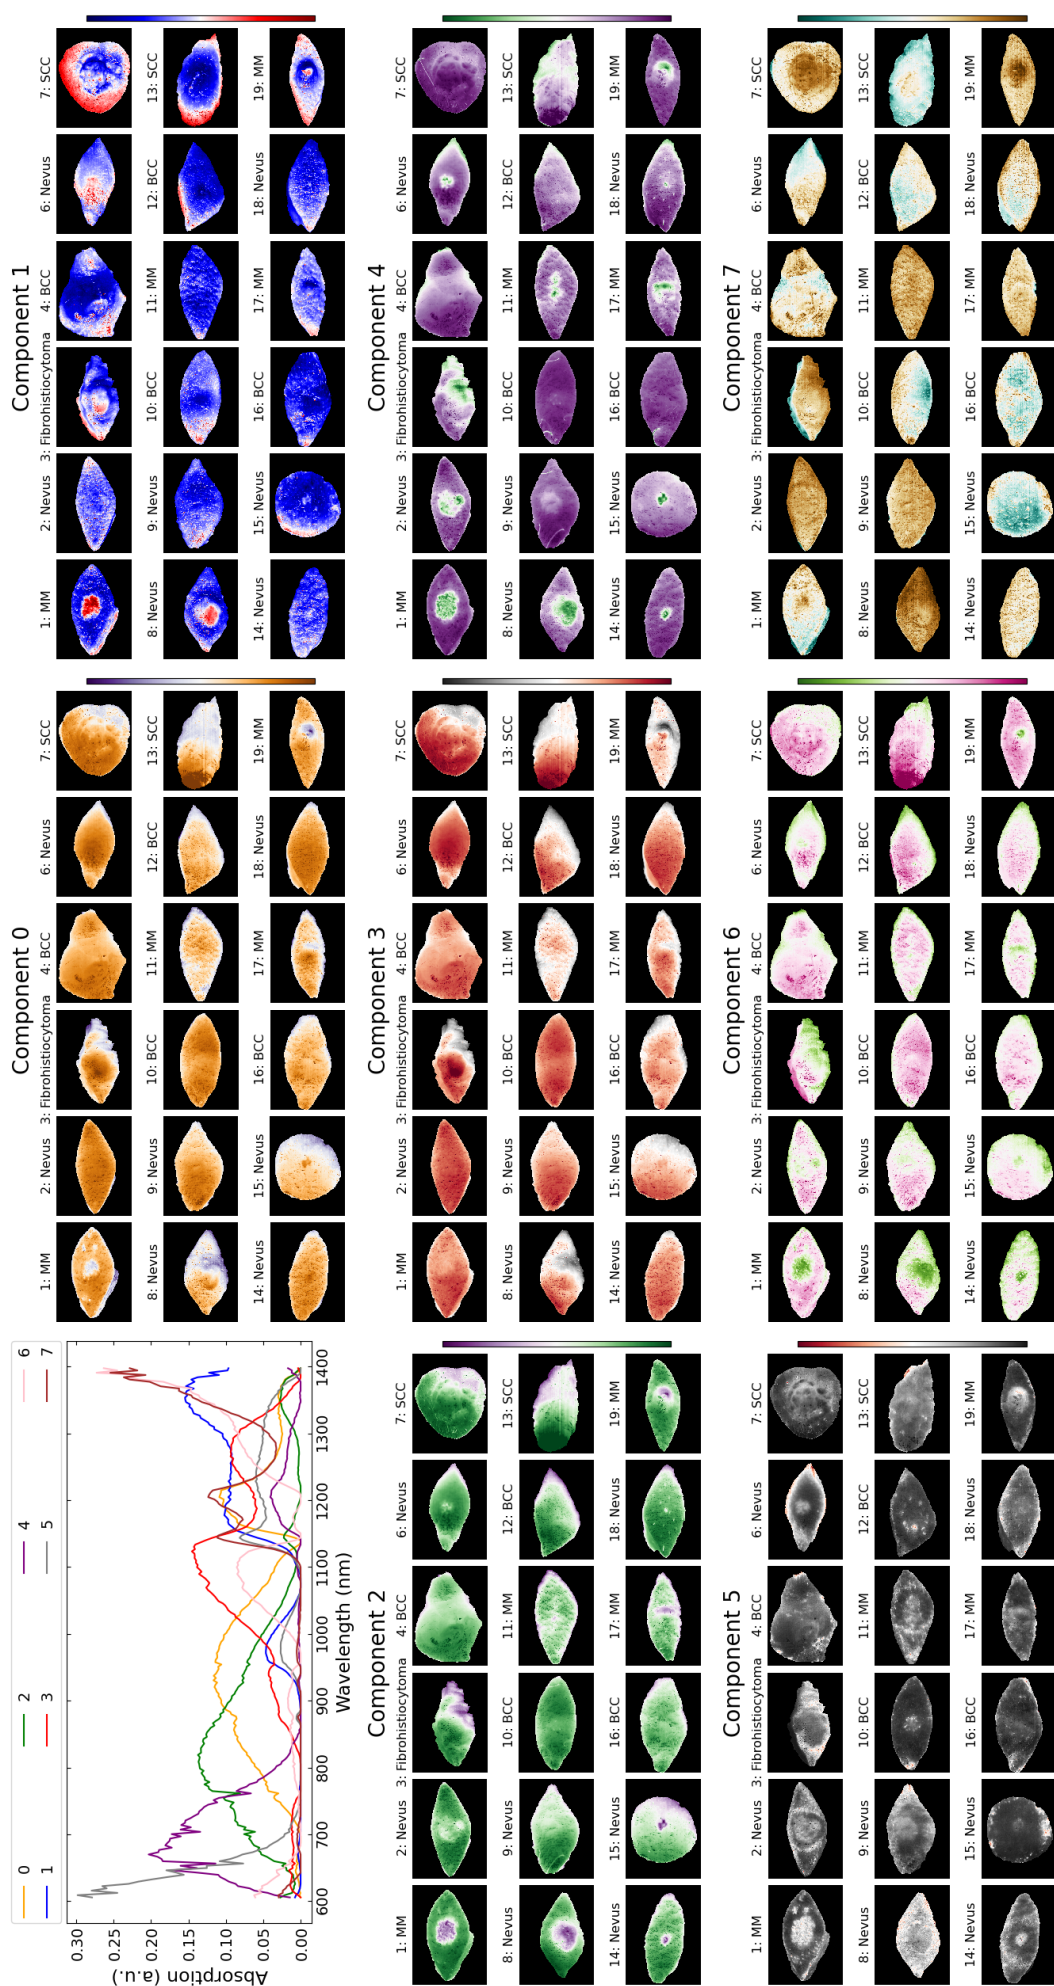

**Figure S6: MCR-ALS decomposition for all tumors, related to Figure 2.**

The top-left panel shows the 8 spectral components, while the remaining 8 panels show the contribution of each component for all the tumor samples.

## MLP

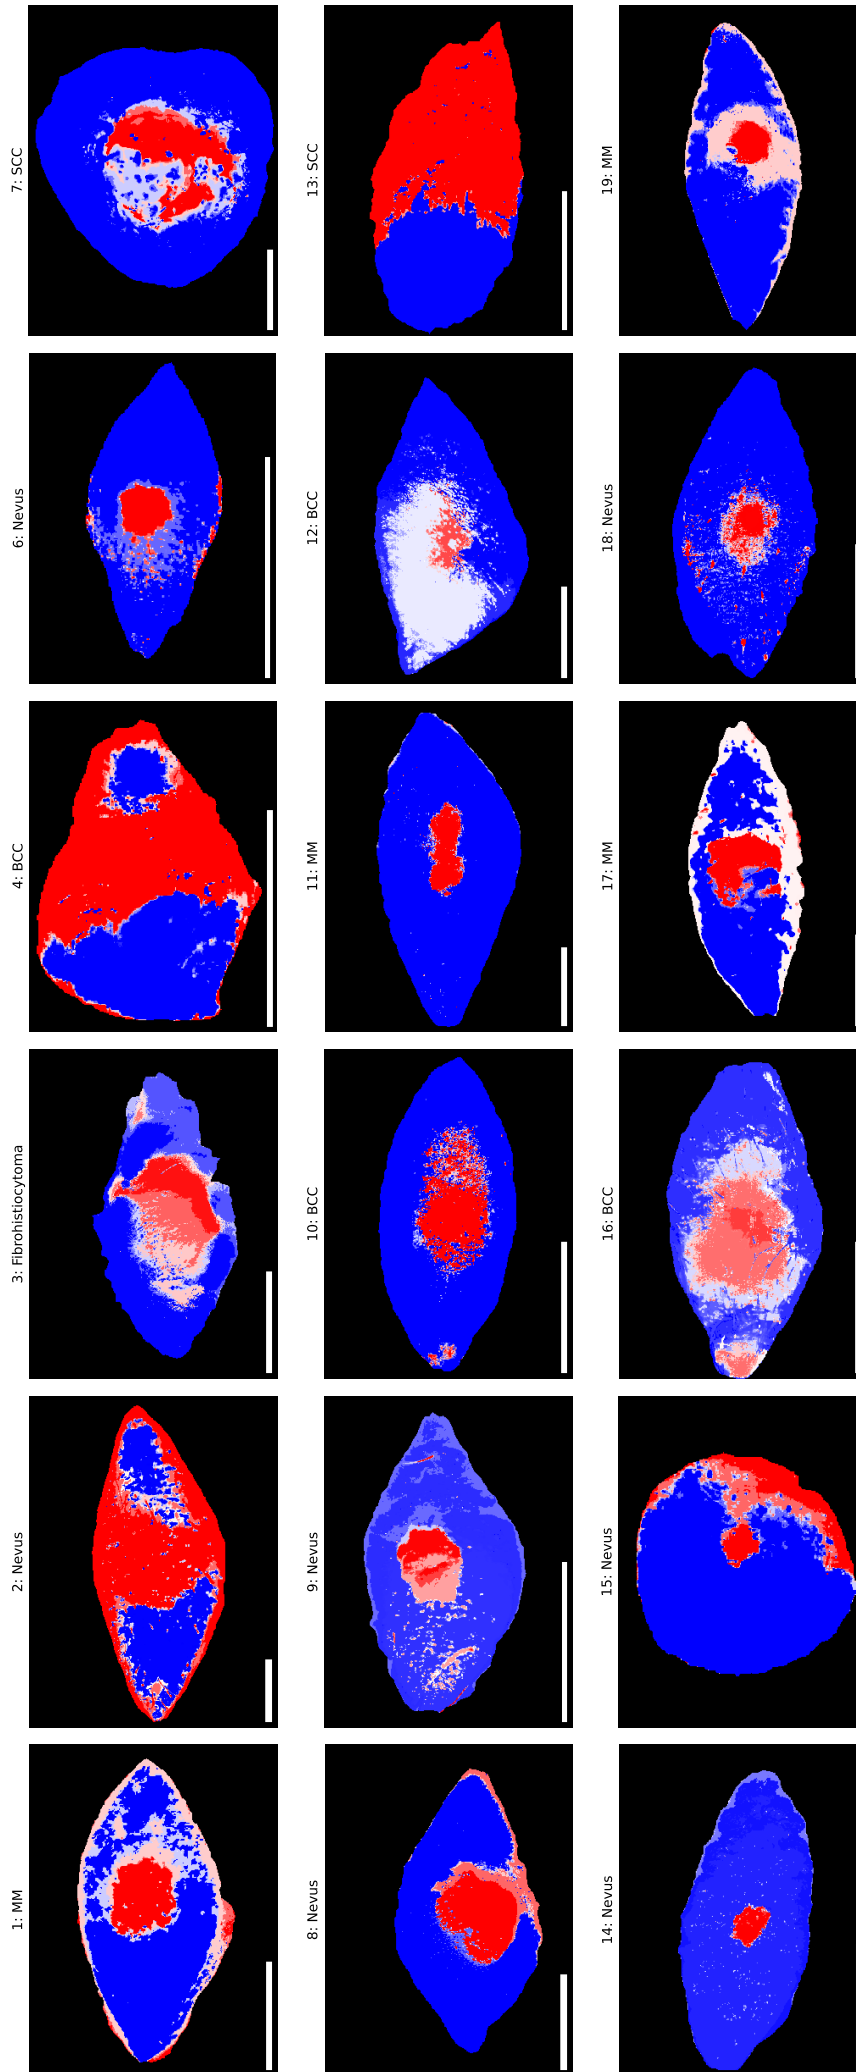

Figure S7: Prediction map for the MLP, related to Figure 3.

## MLP: MCR-ALS

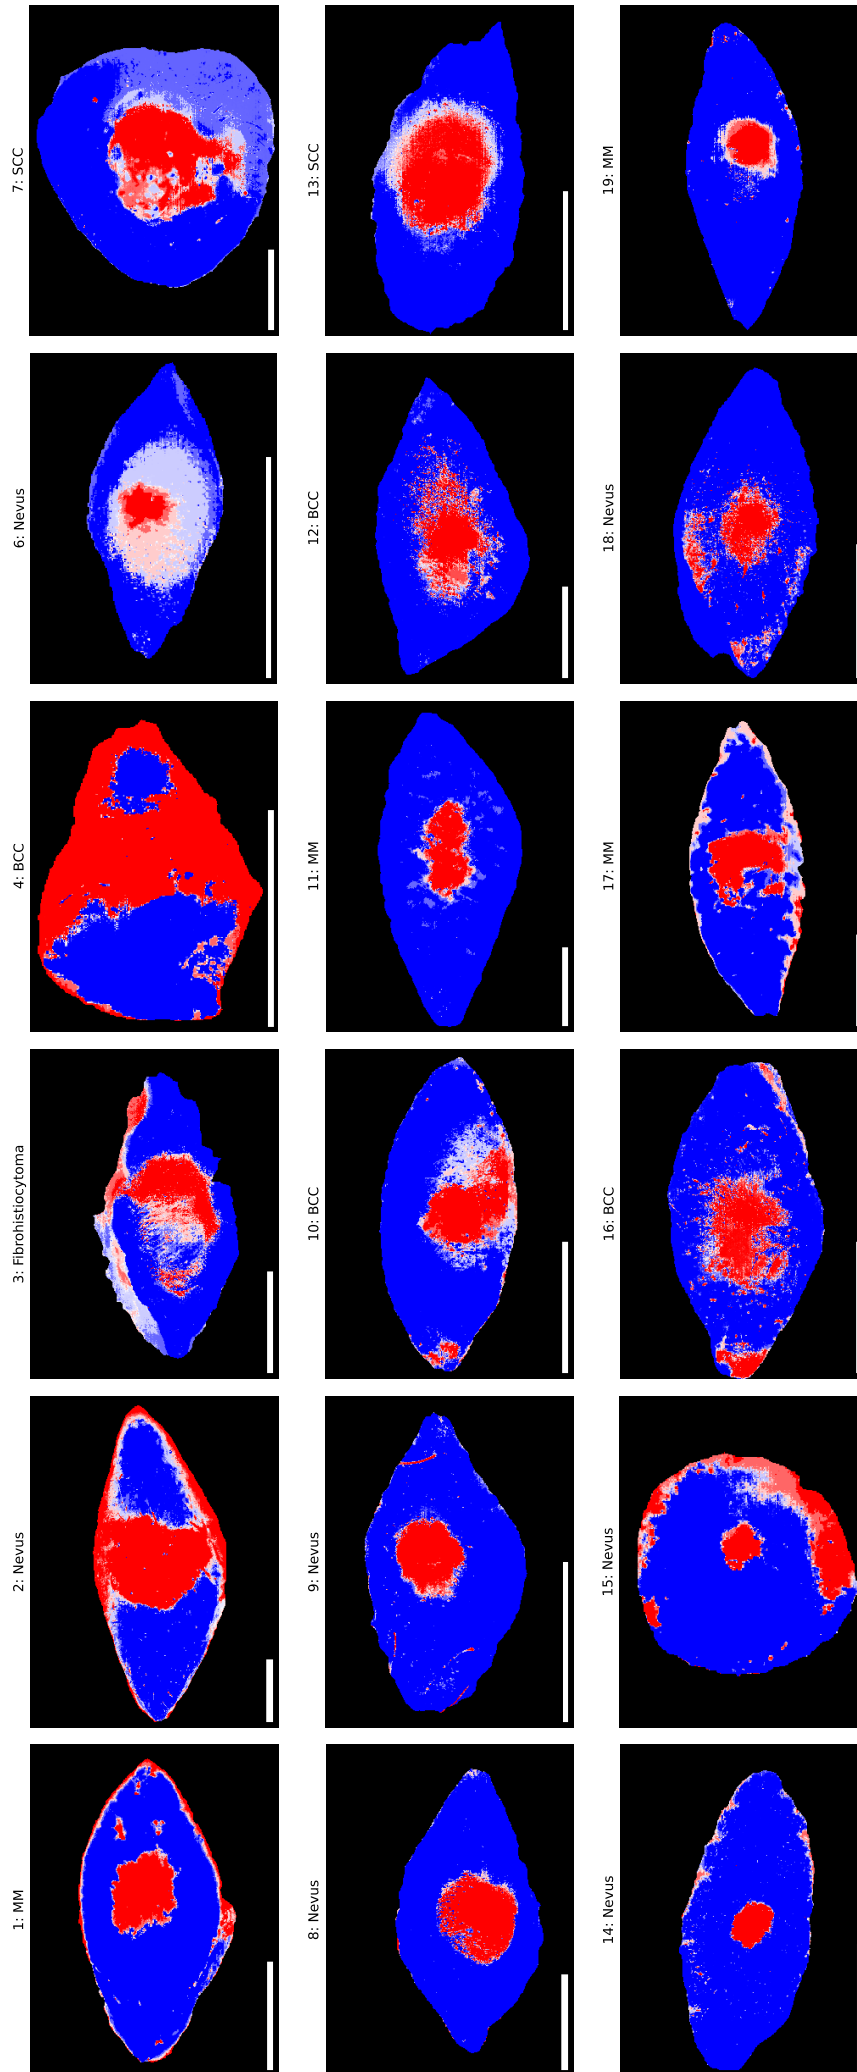

Figure S8: Prediction map for the MLP: MCR-ALS, related to Figure 3.

## CNN

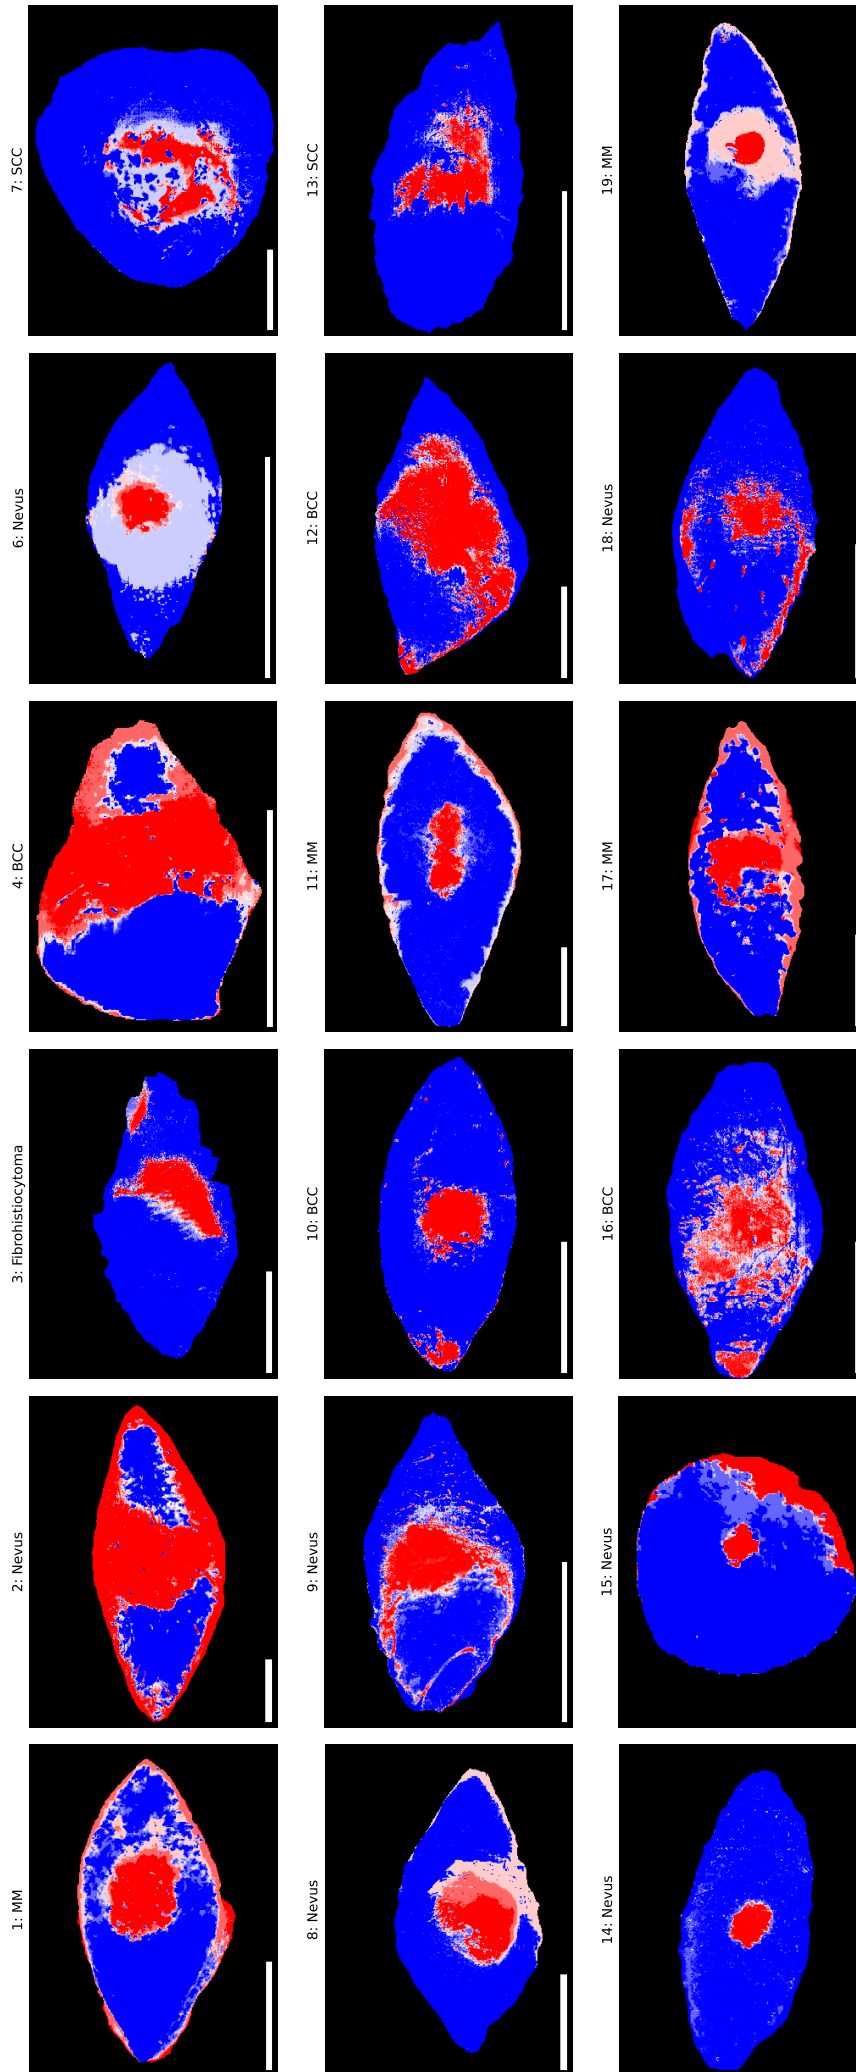

Figure S9: Prediction map for the CNN, related to Figure 3.

600 nm - 750 nm

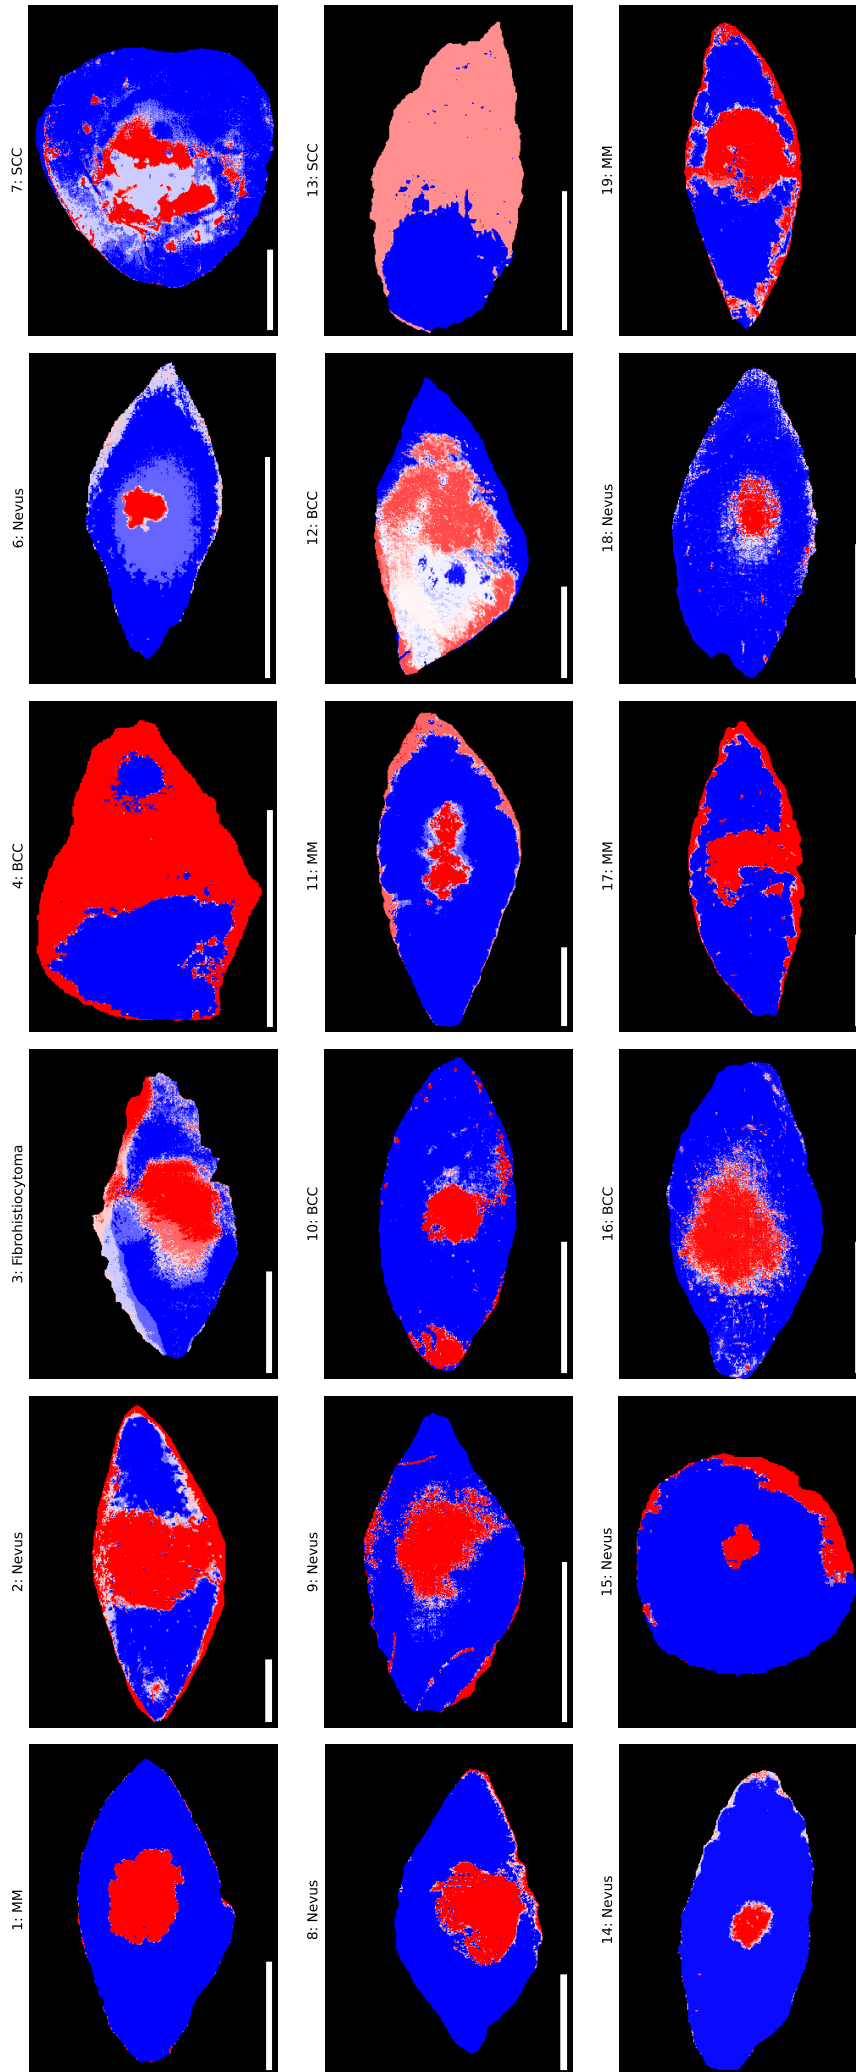

Figure S10: Prediction map for the MLP in the spectral range 600 nm - 750 nm, related to Figure 6.

1000 nm - 1200 nm

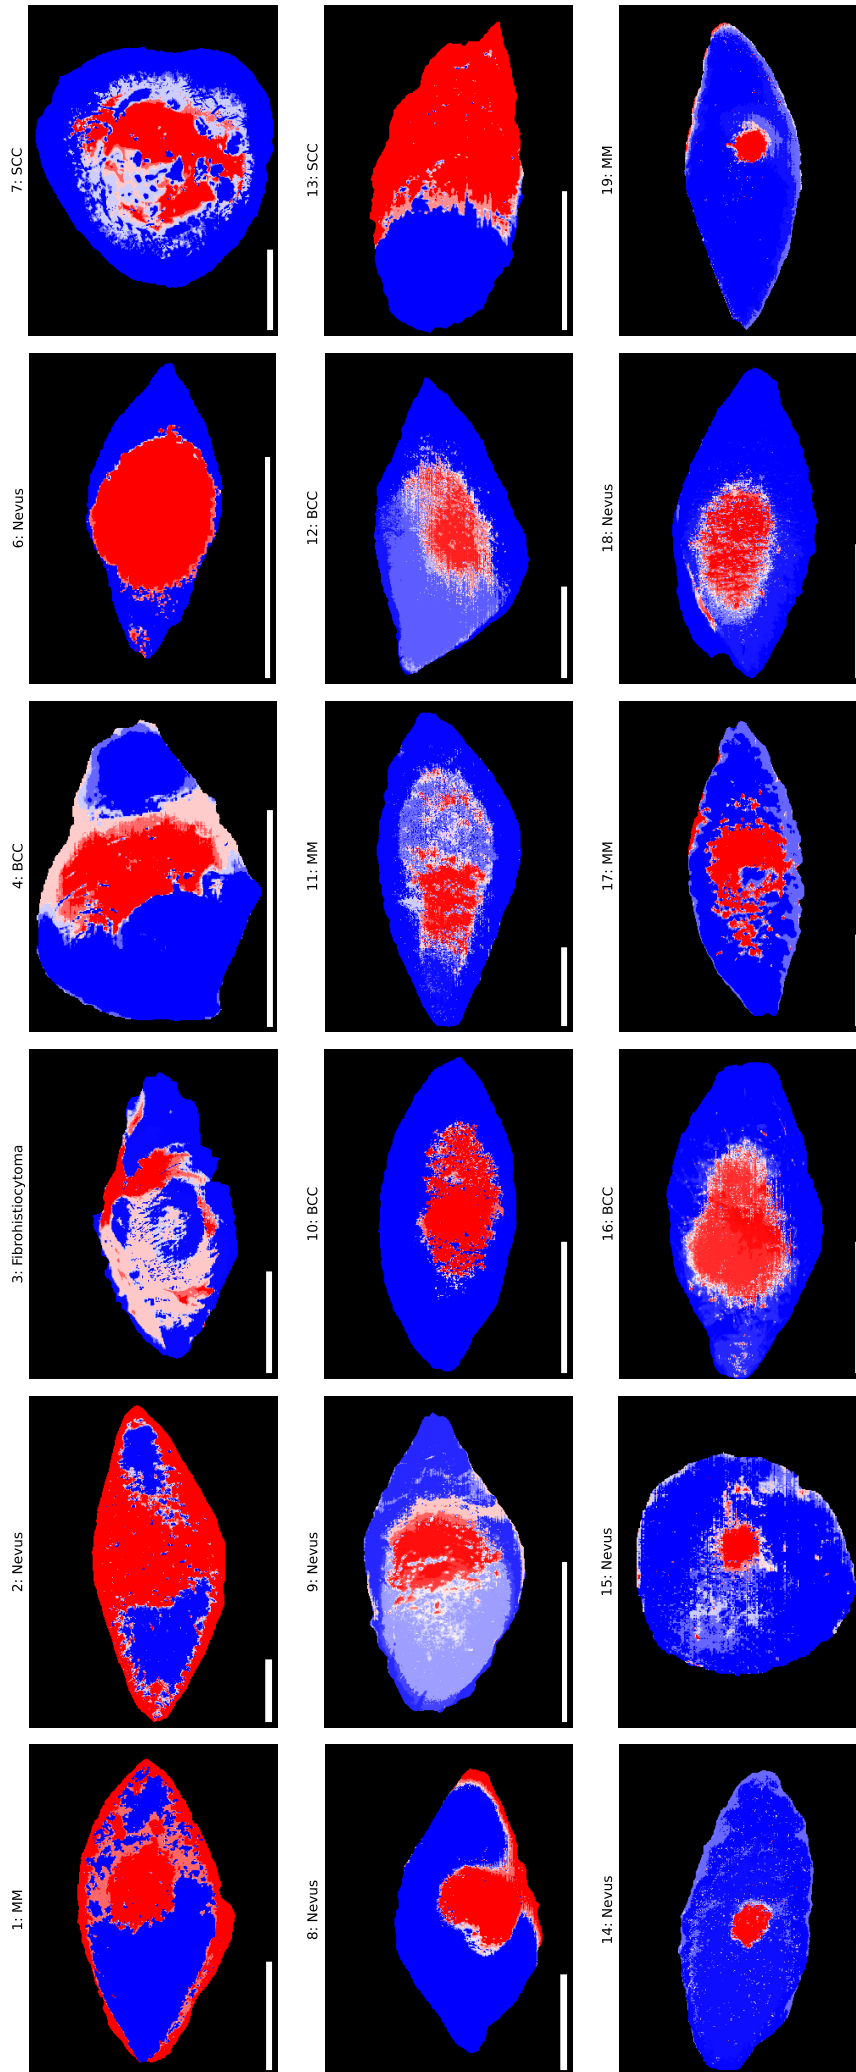

Figure S11: Prediction map for the MLP in the spectral range 1000 nm - 1200 nm, related to Figure 6.

1300 nm - 1400 nm

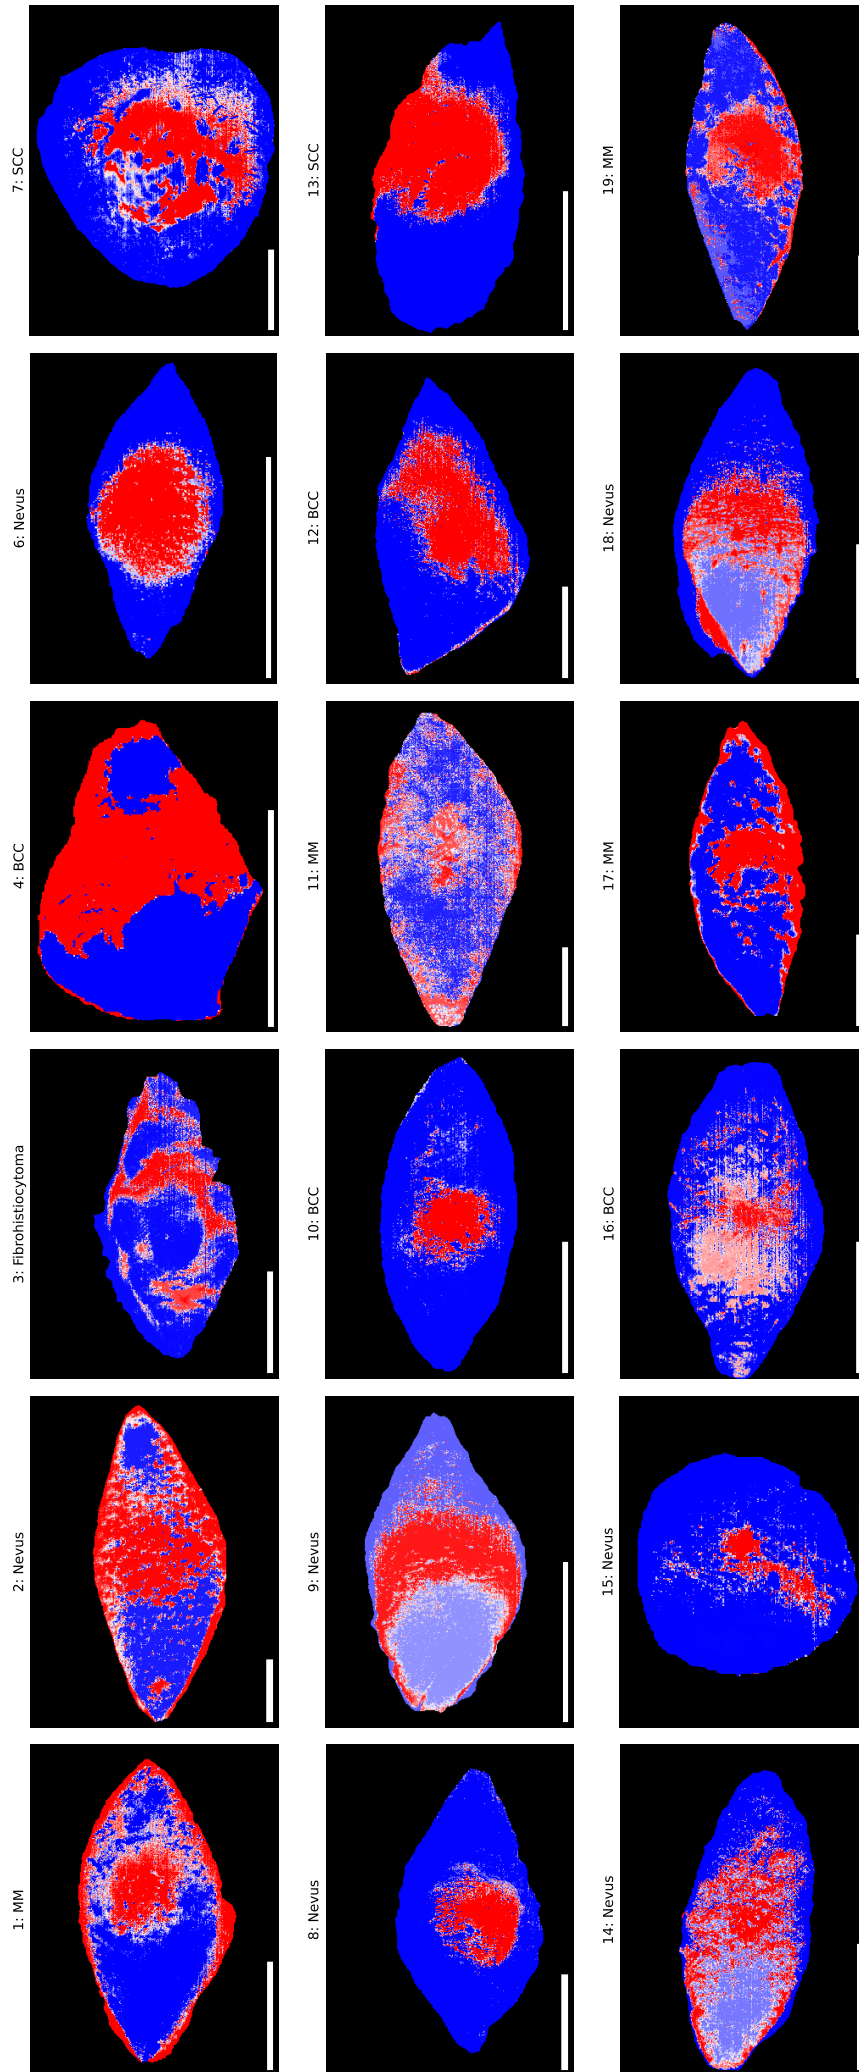

Figure S12: Prediction map for the MLP in the spectral range 1300 nm - 1400 nm, related to Figure 6.

**Table S5: Model widths**, related to Figures 5 & 6.

Measured histology width and predicted tumor widths in mm for each of the 6 presented models for every tumor.

| Lesion no. | Histology | MLP  | CNN  | MLP:<br>MCR-ALS | MLP:<br>600-750 nm | MLP:<br>1000-1200 nm | MLP:<br>1300-1400 nm |
|------------|-----------|------|------|-----------------|--------------------|----------------------|----------------------|
| 1          | 6.89      | 6.90 | 7.20 | 5.95            | 7.10               | 7.75                 | 7.10                 |
| 2          | 15.7      | 15.8 | 15.8 | 15.7            | 15.9               | 13.0                 | 13.1                 |
| 3          | 6.78      | 6.90 | 6.45 | 6.95            | 6.25               | 5.80                 | 6.65                 |
| 4          | 7.83      | 5.65 | 3.35 | 3.30            | -                  | 4.60                 | 3.45                 |
| 6          | 2.39      | 2.36 | 2.67 | 2.77            | 1.96               | 5.53                 | 4.33                 |
| 7          | 13        | 16.0 | 13.4 | 16.5            | 14.2               | 19.8                 | 19.9                 |
| 8          | 9.45      | 9.25 | 9.25 | 8.25            | 9.15               | 8.65                 | 8.65                 |
| 9          | 4.89      | 3.77 | 6.13 | 4.17            | 5.12               | 6.08                 | 5.17                 |
| 10         | 3.45      | 5.26 | 5.01 | 5.01            | 4.56               | 5.61                 | 5.11                 |
| 11         | 8.58      | 4.40 | 4.35 | 6.00            | 5.70               | 9.45                 | 2.55                 |
| 12         | 6.76      | 4.55 | 11.6 | 7.61            | 12.1               | 7.40                 | 9.71                 |
| 13         | 4.97      | 7.70 | 6.49 | 6.69            | 8.15               | 7.85                 | 4.68                 |
| 14         | 2.86      | 2.60 | 2.91 | 2.96            | 2.91               | 2.86                 | 6.28                 |
| 15         | 1.6       | 1.75 | 1.70 | 1.85            | 1.75               | 2.15                 | 2.30                 |
| 16         | 6.61      | 6.25 | 7.10 | 5.60            | 5.75               | 6.10                 | 6.60                 |
| 17         | 8.31      | 8.35 | 8.20 | 8.35            | 8.30               | 8.35                 | 7.40                 |
| 18         | 4.84      | 4.05 | 4.60 | 4.35            | 3.10               | 5.05                 | 6.85                 |
| 19         | 8.54      | 9.90 | 9.80 | 7.15            | 10.7               | 4.60                 | 10.3                 |



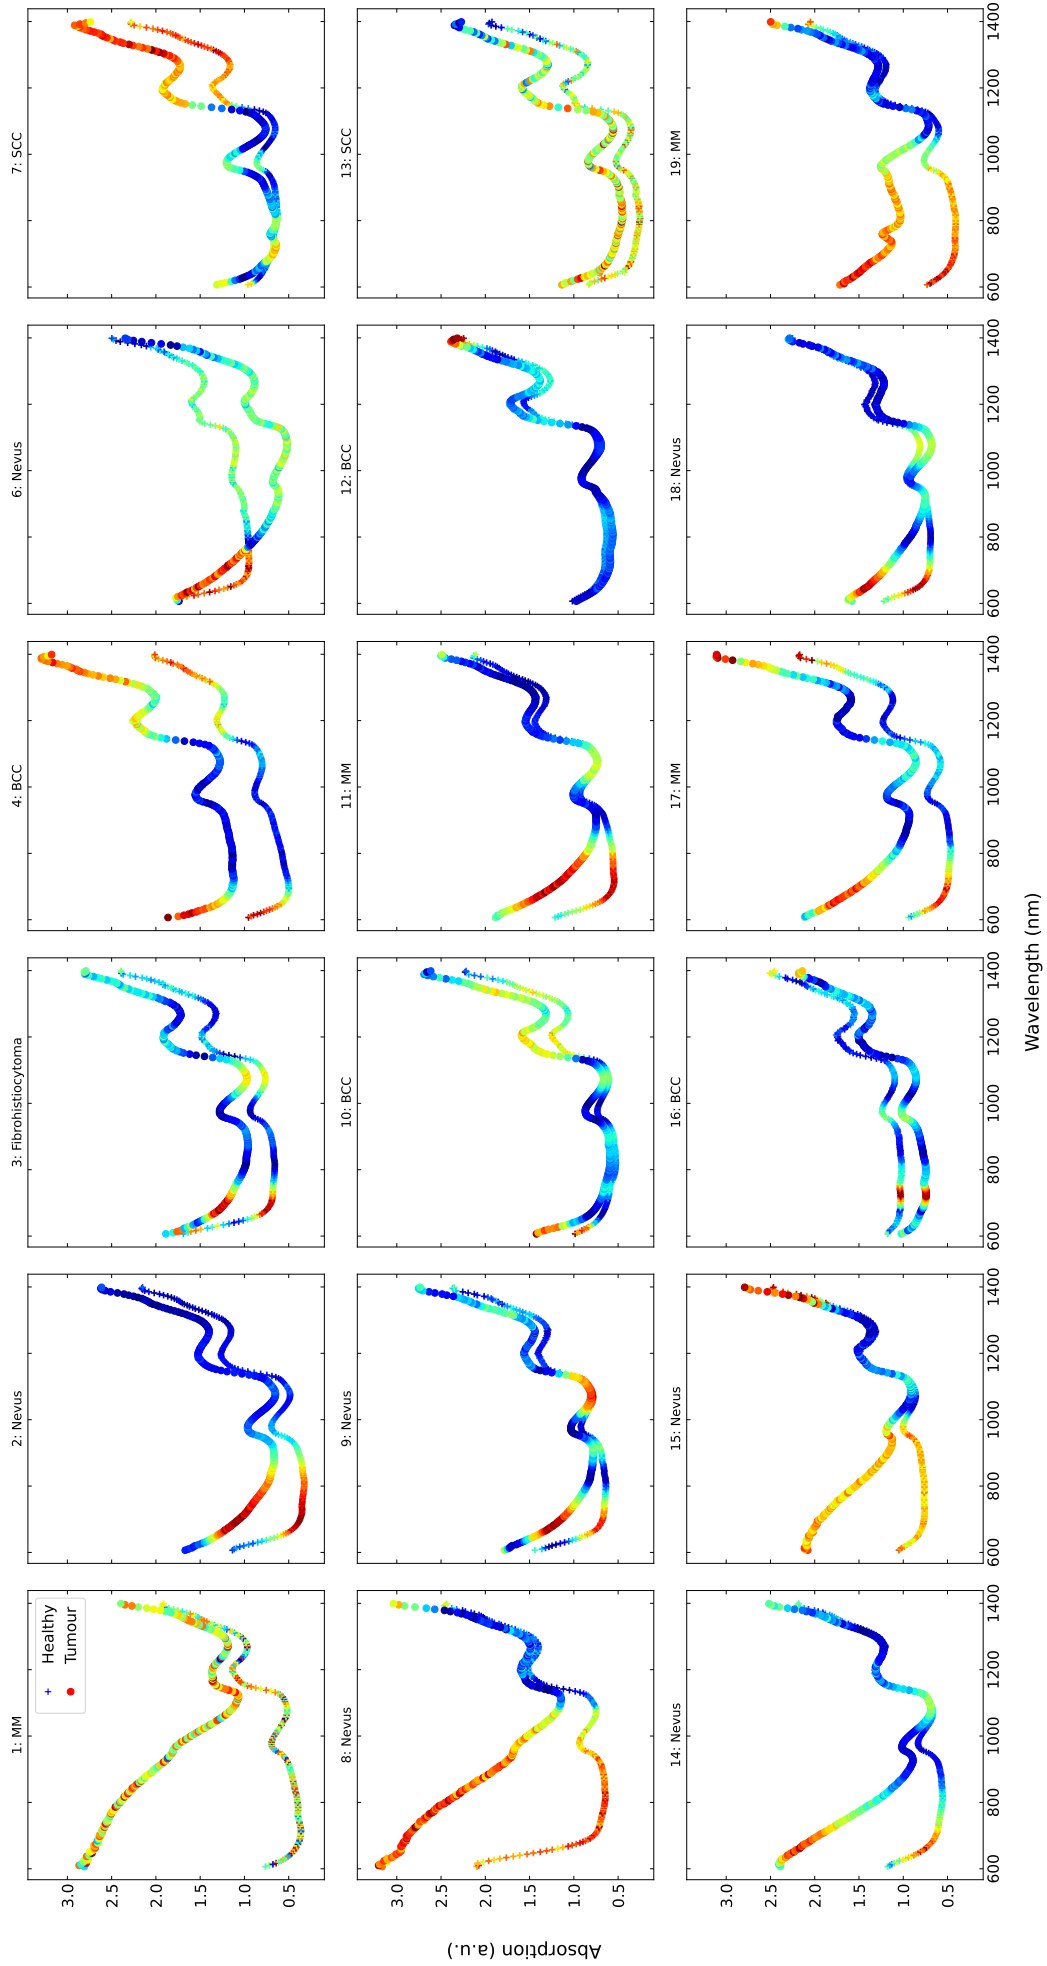

Figure S13: Saliency for all the samples, related to Figure 6.
